# Supplementary material for: Mainstreaming Ecosystem Services and Biodiversity in Peri-Urban Forest Park Creation: Experience From Eastern Europe
Source: Frontiers journal article supplement (doi:10.3389/fenvs.2021.618217), 2021-04-29
Supplement: Data_Sheet_1.docx [file Data_Sheet_1.docx]

**Annex 1**

URBforDAN is implemented in a 40 ha forest parcel, this being part of the “Faget Forest”, the largest peri-urban forest in the close vicinity of Cluj-Napoca. The city of Cluj-Napoca is situated in the northwestern part of Romania. With its 324.576 inhabitants (Statistical yearbooks of Romania | National Institute of Statistics), it is the fourth largest city of Romania. The Cluj metropolitan area has 418.153 inhabitants (Statistical yearbooks of Romania | National Institute of Statistics) and integrates 19 administrative units, 88,4% of the population being in Cluj-Napoca (Studiu pentru actualizarea documentelor strategice pentru Polul de Crestere Cluj Napoca aferente perioadei de programare 2014-2020). During 1992-2014, population dynamics show different trends, with a population increase in Cluj-Napoca and 5 counties (max. 299% increase), and a decrease in the others (Studiu pentru actualizarea documentelor strategice pentru Polul de Crestere Cluj Napoca aferente perioadei de programare 2014-2020), but with an overall population growth rate of 10.66%, especially in the last decade (Bîrsănuc et al., 2019). Population increase is the result of immigration rather than natural increase. Spatial analysis shows that the highest population increase has occurred in the counties situated adjacent to Cluj-Napoca and along the Somes River and the main transport route (European road E60). Cluj-Napoca is a major growth (Bere et al., 2014; Bîrsănuc et al., 2019) and academic pole of Romania. Currently there are 10 universities in the city, including the formal residence of Romania's highest ranked, Babes-Bolyai University (BBU), and more than 70.000 students are enrolled. The fast expansion of the urban area that started after the joining of the EU (Vais, 2009) shows a similar spatial pattern to population growth, with rates varying from 516.88% (2002-2010) to 15.93% (2010-2017) (Bîrsănuc et al., 2019). Accelerated urbanization represents a major threat to forest ecosystems at the periphery of the city. Notably, a severe degradation of the nature protected areas in the urban periphery was documented in the past years, due to the chaotic and sometimes illegal expansion of the buildings (local press articles).

The forest subjected to the project URBforDAN (hereafter focal forest, Figure S1) is owned by the municipality of Cluj-Napoca and administered by the local public forest district. The focal forest occupies a mostly west facing slope (10-18 degrees inclination) and consists of deciduous and coniferous tree stands, with natural and introduced species between cca 10 and 60 years. The forest composition is mostly deciduous, dominated by hornbeam (*Carpinus betulus*), European beech (*Fagus sylvatica*) and sessile oak (*Quercus petraea*), combined with other 12 native tree species (e.g. *Q. robur, Acer pseudoplatanus* and *Tilia cordata*). There are also coniferous plantations for timber production, localized in homogenous patches. The non-native species are Douglas fir (*Pseudotsuga menziesii*) which is largely dominating, the European larch (*Larix decidua*), Scots pine (*Pinus sylvestris*) and the Norway spruce (*Picea abies*).

The biodiversity inventory within the project URBforDan revealed the presence of 76 species of vascular plants (including 23 tree species), six amphibian species, four reptile species, 38 bird species and 18 mammal species, and six species of bats. The study area borders a Natura 2000 site (ROSCI0074 Făgetul Clujului-Valea Morii), designated for the conservation of 11 habitat types, six of them being forest habitats, and several invertebrate species.

As of 2019, the focal forest was taken out from timber production and has been included in the functional category of forests with special protection functions, predominantly social, forest-parks, recreational thematic and educational forests. In this type of forest, interventions that increase access ease are allowed, including alleys, bike tracks, benches, info points, temporary wooden structures and lights.

**References for the Annex 1**

Bere, R. C., Otoiu, A., and (Precup), I. B. (2014). Determinants of Economic Growth in Cities Acting as Growth Poles in Regions from Romania. *Procedia Econ. Financ.* 10, 357–365. doi:10.1016/s2212-5671(14)00415-8.

Bîrsănuc, E. M., Man, T. C., and Petrea, D. (2019). What does unsustainable urban sprawl bring? Spatial patterns analysis of built environment in cluj metropolitan area. *J. Settlements Spat. Plan.* 10, 121–130. doi:10.24193/JSSP.2019.2.05.

Statistical yearbooks of Romania | National Institute of Statistics Available at: https://insse.ro/cms/en/content/statistical-yearbooks-romania [Accessed October 8, 2020].

Studiu pentru actualizarea documentelor strategice pentru Polul de Crestere Cluj Napoca aferente perioadei de programare 2014-2020 Available at: www.urbasofia.eu [Accessed October 8, 2020].

Vais, D. (2009). On the margins of urban europe: Housing policies in a secondary city (Cluj, Romania). *Urban Res. Pract.* 2, 91–102. doi:10.1080/17535060902727082.

**Annex 2.** Visitors profile in the broader Făget forest, within which the 40-hectare forest was designed to serve as urban parc. This study was implemented by every project parthner in order to facilitate the development of a forest park which is also acceptable socio-culturally. The questionnaire was developed by ZaVita d.o.o. Company Ljubljana. The questionnaire was implemented on 143 forest users *in situ*. Below we present only some rough additional information to complement those presented in Figure 1.

1. Stakeholder group profile – Jogging users

| **Stakeholder group name:** | ***Jogging users*** |
| --- | --- |
| **Predominant age class (with %):** | |  | | What is the main purpose of your visit to the Făget Forest? Multiple answers are possible – in this case please rank them in order 1-5 – 1 being the least important purpose and 5 the most important purpose. Jogging | | | | | Total | | --- | --- | --- | --- | --- | --- | --- | --- | | **1** | **2** | **3** | **4** | **5** | | **Age** | **18-30** | 4 | 1 | 0 | 5 | 7 (10%) | 17 | | **30-45** | 5 | 5 | 14 | 10 | 49 (70%) | 83 | | **45-60** | 4 | 2 | 3 | 1 | 13 (19%) | 23 | | **Above 60** | 0 | 0 | 0 | 0 | 1 (1%) | 1 | | **Total** | | 13 | 8 | 17 | 16 | 70 (100%) | 124 | |  |  |  |  |  |  |  |  | |
| **Predominant education status (with %):** | |  | | What is the main purpose of your visit to the Făget Forest? Multiple answers are possible – in this case please rank them in order 1-5 – 1 being the least important purpose and 5 the most important purpose. Jogging | | | | | Total | | --- | --- | --- | --- | --- | --- | --- | --- | | **1** | **2** | **3** | **4** | **5** | | Foral level of education | Elementary School | 0 | 0 | 1 | 0 | 1 (1%) | 2 | | High School | 1 | 1 | 2 | 2 | 4 (6%) | 10 | | College, University | 4 | 3 | 6 | 7 | 31 (44%) | 52 | | Master | 6 | 3 | 8 | 6 | 29 (42%) | 51 | | Doctorate | 2 | 1 | 0 | 1 | 5 (7%) | 9 | | Total | | 13 | 8 | 17 | 16 | 70 (100%) | 124 | |
| **Predominant working status (with %):** | |  | | What is the main purpose of your visit to the Făget Forest? Multiple answers are possible – in this case please rank them in order 1-5 – 1 being the least important purpose and 5 the most important purpose. Jogging | | | | | Total | | --- | --- | --- | --- | --- | --- | --- | --- | | **1** | **2** | **3** | **4** | **5** | | Employment status | Employed | 7 | 8 | 9 | 11 | 53 (76%) | 88 | | Employed, Self employed | 1 | 0 | 1 | 1 | 1 (1%) | 4 | | Self employed | 3 | 0 | 3 | 2 | 14 (20%) | 22 | | Pupil/student | 2 | 0 | 1 | 1 | 1 (1%) | 5 | | Unemployed | 0 | 0 | 0 | 1 | 0 | 1 | | Event organizer | 0 | 0 | 1 | 0 | 0 | 1 | | Free lancer | 0 | 0 | 1 | 0 | 0 | 1 | | Registered sole trader | 0 | 0 | 1 | 0 | 1 (1%) | 2 | | Total | | 13 | 8 | 20 | 16 | 70 (100%) | 124 | |
| **Average distance from the focus area (with %):** | |  | | What is the main purpose of your visit to the Făget Forest? Multiple answers are possible – in this case please rank them in order 1-5 – 1 being the least important purpose and 5 the most important purpose. Jogging | | | | | Total | | --- | --- | --- | --- | --- | --- | --- | --- | | **1** | **2** | **3** | **4** | **5** | | Location of the residence | Near vicinity of the Făget Forest (up to 1 km away) | 2 | 1 | 1 | 4 | 8 (11%) | 16 | | Vicinity of the Făget Forest (up to 3 km away) | 4 | 1 | 9 | 6 | 23 (33%) | 43 | | The City of Cluj-Napoca (up to 3 km away from focus area) | 5 | 6 | 6 | 4 | 35 (50%) | 56 | | Outside the City of Cluj-Napoca | 2 | 0 | 1 | 2 | 4 (6%) | 9 | | Total | | 13 | 8 | 17 | 16 | 70 | 124 | |
| **How often do they on average visit the focus area (with %):** | |  | | What is the main purpose of your visit to the Făget Forest? Multiple answers are possible – in this case please rank them in order 1-5 – 1 being the least important purpose and 5 the most important purpose. Jogging | | | | | Total | | --- | --- | --- | --- | --- | --- | --- | --- | | **1** | **2** | **3** | **4** | **5** | | How often do you visit the Făget Forest? | Daily | 1 | 0 | 1 | 3 | 3 (4%) | 8 | | Once per week | 3 | 2 | 3 | 1 | 17 (23%) | 26 | | Several times per week | 0 | 0 | 6 | 4 | 30 (43%) | 40 | | Once a month | 4 | 3 | 4 | 4 | 3 (4%) | 18 | | Several times per month | 0 | 0 | 1 | 4 | 10 (15%) | 15 | | Several times per year | 5 | 3 | 2 | 0 | 7 (10%) | 17 | | Total | | 13 | 8 | 17 | 16 | 70 (100%) | 124 | |
| **How much time do they on average spend on the focus area (with %):** | |  | | What is the main purpose of your visit to the Făget Forest? Multiple answers are possible – in this case please rank them in order 1-5 – 1 being the least important purpose and 5 the most important purpose. Jogging | | | | | Total | | --- | --- | --- | --- | --- | --- | --- | --- | | **1** | **2** | **3** | **4** | **5** | | How much time do you on average spend on Făget Forest per visit? | Up-to 1 h | 0 | 0 | 0 | 0 | 1 (1%) | 1 | | 1-2 h | 7 | 2 | 7 | 6 | 37 (53%) | 59 | | 2-5 h | 5 | 5 | 8 | 9 | 27 (39%) | 54 | | More than 5 h | 1 | 1 | 1 | 0 | 2 (3%) | 5 | | Up-to 1h, 1-2 h, 2-5 h | 0 | 0 | 0 | 0 | 1 (1%) | 1 | | 1-2 h, 2-5 h | 0 | 0 | 1 | 1 | 2 (3%) | 4 | | Total | | 13 | 8 | 17 | 16 | 70 (100%) | 124 | |
| **Do they know what type of protection/adapted management regime is present on the focus area (with %)?** | |  | | What is the main purpose of your visit to the Făget Forest? Multiple answers are possible – in this case please rank them in order 1-5 – 1 being the least important purpose and 5 the most important purpose. Jogging | | | | | Total | | --- | --- | --- | --- | --- | --- | --- | --- | | **1** | **2** | **3** | **4** | **5** | | Do you think that the area of Făget Forest is partially or fully protected as | Area of high natural value | 1 | 0 | 1 | 1 | 13 (19%) | 16 | | Area of high natural value and ”Natura 2000” area | 0 | 0 | 1 | 1 | 2 (3%) | 4 | | Area of high natural value, ”Natura 2000” area, Forest with special purpose, Cultural heritage area and Protected area | 0 | 0 | 0 | 0 | 1 (1.5%) | 1 | | Area of high natural value, ”Natura 2000” area and Cultural heritage area | 0 | 0 | 0 | 0 | 1 (1.5%) | 1 | | Area of high natural value, ”Natura 2000” area and Protected area | 1 | 0 | 1 | 0 | 0 | 2 | | Area of high natural value and Forest with special purpose | 1 | 0 | 0 | 0 | 0 | 1 | | Area of high natural value and Protected area | 0 | 0 | 1 | 1 | 0 | 2 | | Area of high natural value; No, it is not protected | 0 | 0 | 0 | 0 | 1 (1.5%) | 1 | | ”Natura 2000” area | 7 | 4 | 8 | 8 | 34 (49%) | 61 | | ”Natura 2000” area and Protected area | 0 | 0 | 0 | 1 | 3 (4%) | 4 | | ”Natura 2000” area, Cultural heritage area  and Protected area | 0 | 0 | 0 | 0 | 1 (1.5%) | 1 | | ”Natura 2000” area and No, it is not protected | 1 | 0 | 1 | 0 | 1 (1.5%) | 3 | | Protected area | 0 | 0 | 1 | 1 | 1 (1.5%) | 3 | | Cultural heritage area | 0 | 1 | 0 | 0 | 0 | 1 | | Forest with special purpose | 1 | 0 | 1 | 1 | 2 (3%) | 5 | | No, it is not protected | 1 | 3 | 2 | 2 | 10 (14%) | 18 | | Total | | 13 | 8 | 17 | 16 | 70 (100%) | 124 | |
| **List of key expressed problems/challenges:** | The activities which should be restricted in Făget Forest acording to the jooging users are:   - All motorized sports (hard enduro, off road, motocross) and vehicles (motorcycles, vehicles, all terrain vehicles, pick-up cars, tractors) producing ditches and disturbing noise, dust, pollution; - Fire in the forest; - The loud music; - Destroying the wood with garbage; - The new constructions; - Painting the trees and stacking various posters on tree bark should be forbidden (to mark the route). At present, an overwhelmingly large number of trees have different markings, apart from tourist ones; - Commercial activities in the wood; - Camping; - Deforestation; - The barbeques because they are not beneficial to the environment, plus people usually leave a lot of mess behind them; - Hunting - danger of extinction of wildlife and endangering people in forest; - Grazing; |
| **List of key expressed suggestions for improvement:** | The activities proposed by the jogging users are diverse and include:   - School of forest- educational activities for children (biology, ecology); - Educational apiary (after the Vienna model)- a wooden pavilion and hives where children can learn about bees, plus basic equipment for extracting honey; - Forest ecological activities; - Non-polluting, recreational activities (walks); - Sport activities and competitions, designed to popularize the area (running, cycling, hiking); - Illuminated walking alleys; - Trips for children; - Arrangement/ remarking of running, hiking, cycling trails; - Birdwatching; - Garbage cans; - Guarding the wood; - Pet walking; - The construction of sidewalks; - Traction bars; - Maintenance of the sign posts; - Separation of the running trail from the cycling and motorized vehicles trail; - Organizing certain days with special themes; - Combating the cutting of the trees; - Afforestation; - Ecological education; - Prohibition of constructions in the immediate vicinity of the forest; - A plan with trails, stopping places, playgrounds; - Activities to increase understanding of the area; - Protection of animal species and vegetation; - Mounting fixed posts for guidance; - Downloadable maps from the internet; - Sports orientation; - Athletics track; - Zone for feeding deer, birds etc.; - Something different from an urban forest with all kinds of artificial installations; - Building a zoo; - Sleigh with horses in winter; - An escalade panel; - Picnic areas; - Clearer maps of the area. |

1. Stakeholder group profile – hiking users

| **Stakeholder group name:** | ***Hiking users*** |
| --- | --- |
| **Predominant age class (with %):** | |  | | 3) What is the main purpose of your visit to the Făget Forest? Multiple answers are possible – in this case please rank them in order 1-5 – 1 being the least important purpose and 5 the most importnt purpose. Hiking | | | | | Total | | --- | --- | --- | --- | --- | --- | --- | --- | | **1** | **2** | **3** | **4** | **5** | | **Age** | **18-30** | 0 | 2 | 3 | 3 | 7 (12%) | 15 | | **30-45** | 3 | 7 | 17 | 20 | 39 (66%) | 86 | | **45-60** | 2 | 3 | 5 | 7 | 12 (20%) | 29 | | **Above 60** | 0 | 0 | 0 | 1 | 1 (2%) | 2 | | **Total** | | 5 | 12 | 25 | 16 | 59 (100%) | 132 | |
| **Predominant education status (with %):** | |  | | 3) What is the main purpose of your visit to the Făget Forest? Multiple answers are possible – in this case please rank them in order 1-5 – 1 being the least important purpose and 5 the most important purpose. Hiking | | | | | Total | | --- | --- | --- | --- | --- | --- | --- | --- | | **1** | **2** | **3** | **4** | **5** | | Formal level of education | Elementary School | 0 | 0 | 0 | 1 | 1 (2%) | 2 | | HighSchool | 0 | 2 | 1 | 2 | 4 (7%) | 9 | | College, University | 3 | 3 | 14 | 12 | 24 (40%) | 56 | | Master | 2 | 5 | 8 | 15 | 27 (46%) | 56 | | Doctorate | 0 | 2 | 2 | 1 | 3 (5%) | 8 | | Total | | 5 | 12 | 25 | 31 | 59 (100%) | 132 | |
| **Predominant working status (with %):** | |  | | What is the main purpose of your visit to the Făet Forest? Multiple answers are possible – in this case please rank them in order 1-5 – 1 being the least important purpose and 5 the most important purpose. Hiking | | | | | Total | | --- | --- | --- | --- | --- | --- | --- | --- | | **1** | **2** | **3** | **4** | **5** | | Employment status | Employed | 3 | 11 | 15 | 22 | 43 (73%) | 94 | | Employed, Self emloyed | 0 | 0 | 1 | 1 | 2 (3%) | 4 | | Self employed | 2 | 1 | 7 | 5 | 9 (15%) | 24 | | Pupil/student | 0 | 0 | 1 | 0 | 3 (5%) | 4 | | Unemployed | 0 | 0 | 0 | 0 | 1 (2%) | 1 | | Event organizer | 0 | 0 | 0 | 1 | 0 | 1 | | Retired | 0 | 0 | 0 | 1 | 0 | 1 | | Free lancer | 0 | 0 | 1 | 0 | 0 | 1 | | Registered sole trader | 0 | 0 | 0 | 1 | 1 (2%) | 2 | | Total | | 5 | 12 | 25 | 31 | 59 (100%) | 132 | |
| **Average distance from the focus area (with %):** | |  | | What is the main purpose of your visit to the Făget Forest? Multiple answers are possible – in this case please rank them in order 1-5 – 1 being the least important purpose and 5 the most important purpose. Hiking | | | | | Total | | --- | --- | --- | --- | --- | --- | --- | --- | | **1** | **2** | **3** | **4** | **5** | | Location of the residence | Near vicinity of the Făget Forest (up to 1 km away) | 1 | 1 | 3 | 7 | 4 (7%) | 16 | | Vicinity of the Făget Forest (up to 3 km away) | 2 | 6 | 11 | 8 | 18 (30%) | 45 | | The City of Cluj-Napoca (u to 3 km away from focus area) | 2 | 4 | 10 | 13 | 31 (53%) | 60 | | Outside the City of Cluj-Napoca | 0 | 1 | 1 | 3 | 6 (10%) | 9 | | Total | | 5 | 12 | 25 | 31 | 59 (100%) | 132 | |
| **How often do they on average visit the focus area (with %):** | Most of the hiking users are visiting the Făget Forest several times per week (25%- 15 persons). 19% of the hiking users   |  | | What is the main purpose of your visit to the Făget Forest? Multiple answers are possible – in this case please rank them in order 1-5 – 1 being the least important purpose and 5 the most important purpose. Hiking | | | | | Total | | --- | --- | --- | --- | --- | --- | --- | --- | | **1** | **2** | **3** | **4** | **5** | | How often do you visit the Făget Forest? | Daily | 0 | 0 | 2 | 2 | 4 (7%) | 8 | | Once per week | 2 | 3 | 5 | 8 | 11 (19%) | 29 | | Several times per week | 1 | 2 | 8 | 8 | 15 (25%) | 34 | | Once a month | 1 | 2 | 4 | 5 | 8 (13%) | 20 | | Several times per month | 0 | 2 | 1 | 5 | 9 (15%) | 17 | | Several times per year | 1 | 3 | 4 | 2 | 10 (17%) | 17 | | Once a week, severl times per week | 0 | 0 | 1 | 1 | 1 (2%) | 3 | | Once a month, several times per month | 0 | 0 | 0 | 0 | 1 (2%) | 1 | | Total | | 5 | 12 | 25 | 31 | 59 (100%) | 132 | |
| **Predominant type of access to the focus area (with %):** | |  | | What is the main purpose of your visit to the Făget Forest? Multiple answers are possible – in this case please rank them in order 1-5 – 1 being the least important purpose and 5 the most important purpose. Hiking | | | | | Total | | --- | --- | --- | --- | --- | --- | --- | --- | | **1** | **2** | **3** | **4** | **5** | | How do you usually access Făget Forest? | On foot | 2 | 2 | 4 | 9 | 10 (17%) | 27 | | On foot, by bicycle | 1 | 0 | 1 | 2 | 0 | 4 | | On foot, by bicycle, by car | 0 | 0 | 3 | 3 | 5 (9%) | 11 | | On foot, by public transport | 0 | 0 | 0 | 0 | 1 (2%) | 1 | | On foot, by public transport, by car | 0 | 0 | 0 | 0 | 1 (2%) | 1 | | On foot, by car | 0 | 0 | 2 | 1 | 3 (5%) | 6 | | By bicycle | 0 | 1 | 3 | 2 | 2 (3%) | 8 | | By bicycle, by public transport | 0 | 0 | 1 | 0 | 0 | 1 | | By bicycle, by public transport, by car | 0 | 0 | 1 | 0 | 2 (3%) | 3 | | By bicycle, by car | 0 | 2 | 0 | 4 | 6 (10%) | 12 | | By public transport | 2 | 0 | 1 | 1 | 5 (8%) | 6 | | By public transport, by car | 0 | 0 | 0 | 1 | 0 | 1 | | By car | 2 | 7 | 10 | 8 | 24 (41%) | 51 | | Total | | 5 | 12 | 25 | 31 | 59 (100%) | 132 | |
| **How much time do they on average spend on the focus area (with %):** | |  | | What is the main purpose of your visit to the Făget Forest? Multiple answers are possible – in this case please rank them in order 1-5 – 1 being the least important purpose and 5 the most important purpose. Hiking | | | | | Total | | --- | --- | --- | --- | --- | --- | --- | --- | | **1** | **2** | **3** | **4** | **5** | | How much time do you on average spend on Făget Forest per visit? | 1-2 h | 2 | 6 | 12 | 14 | 23 (39%) | 57 | | 2-5 h | 3 | 5 | 11 | 16 | 27 (46%) | 62 | | More than 5 h | 0 | 0 | 1 | 0 | 6 (10%) | 7 | | Up-to 1h, 1-2 h, 2-5 h | 0 | 0 | 0 | 0 | 1 (2%) | 1 | | 1-2 h, 2-5 h | 0 | 1 | 1 | 1 | 2 (3%) | 5 | | Toal | | 5 | 1 | 25 | 31 | 59 (100%) | 132 | |
| **Do they know what type of protection/adapted management regime is present on the focus area (with %)?** | |  | | What is the main purpose of your visit to the Făget Forest? Multiple answers are possible – in this case please rank them in order 1-5 – 1 being the least important purpose and 5 the most important purpose. Hiking | | | | | Total | | --- | --- | --- | --- | --- | --- | --- | --- | | **1** | **2** | **3** | **4** | **5** | | Do you think that the area of Făget Forest is partially or fully protected as | Area of high natural value | 0 | 1 | 2 | 4 | 7 (12%) | 14 | | Area of high natural value and ”Natura 2000” area | 0 | 0 | 0 | 1 | 4 (7%) | 5 | | Area of high natural value, ”Natura 2000” area, Forest with special purpose, Cultural heritage area and Protected area | 0 | 0 | 0 | 1 | 0 | 1 | | Area of high natural value, ”Natura 2000” area and Cultural heritage area | 0 | 0 | 0 | 0 | 1 (2%) | 1 | | Area of high natural value, ”Natura 2000” area and Protected area | 0 | 0 | 1 | 0 | 1 (2%) | 2 | | Area of high natural value and Forest with special purpose | 0 | 0 | 1 | 0 | 0 | 1 | | Area of high natural value and Protected area | 0 | 0 | 1 | 1 | 0 | 2 | | Area of high natural value; No, it is not protected | 0 | 0 | 0 | 0 | 2 (3%) | 2 | | ”Natura 2000” area | 0 | 7 | 11 | 18 | 26 (45%) | 66 | | ”Natura 2000” area and Protected area | 0 | 0 | 0 | 0 | 1 (2%) | 1 | | ”Natura 2000” area, Cultural heritage area  and Protected area | 0 | 0 | 0 | 0 | 1 (2%) | 1 | | ”Natura 2000” area and Forest with special purpose | 0 | 0 | 0 | 2 | 0 | 2 | | ”Natura 2000” area and No, it is not protected | 1 | 0 | 0 | 1 | 1 (2%) | 3 | | Protected area | 0 | 0 | 0 | 0 | 2 (3%) | 2 | | Cultural heritage area | 0 | 0 | 0 | 0 | 1 (2%) | 1 | | Forest with special purpose | 0 | 1 | 2 | 0 | 3 (4%) | 6 | | No, it is not protected | 0 | 3 | 7 | 3 | 8 (14%) | 21 | | Total | | 5 | 12 | 25 | 31 | 59 (100%) | 132 | |
| **List of key expressed problems/challenges:** | The hiking users consider that the further activities should be forbidden in the Făget Forest:   - The access of the motorized vehicles and motorized sports; - Throwing waste; - Lighting fire in the forest, or her vicinity; - The grills; - The loud parties and music; - Forest exploitation/ deforestation and illegal cuttings, chainsaws; - The grazing of the animals; - Building facilities/ constructions in or near the forest; - Garbage storage; - Smoking in the wood; - Hunting - danger of extinction of wild animals and danger to people in the forest; - Walking dogs without leash; |
| **List of key expressed suggestions for improvement:** | The hiking users consider that the further activities should be developed in the Făget Forest:   - Activities to identify tree species, traces of wild animals and types of mushrooms; - Running, hiking, walking, cycling; - Sport competitions; - The installation of hiking, running, cycling trails; - The installation of trash cans; - The installation of parking lots; - The installation of sidewalks; - The installation of sign posts to marked trails; - The installation of a climbing board; - Trips for children from the schools in Cluj-Napoca; - Adventure park; - More effective fine system for those who don’t pick up the trash after picnics; - Guarding the forest; local police / gendarmerie patrollers to prevent 4x4 access, waste abandonment, illegal cuts; - Conservation of nature; - Lighting the forest; - Educational activities; - Photo safaris; - Volunteering activities; - Integration of Făget trails into national and international long-distance trails (Via Maria, Via Carpatica); - Tourist and sports orientation; - Sled track; - Horse riding; - Forest ecological actions; - Educational paths; - At the entrance to the forest a plan with trails, stopping places, playgrounds; - More hiking; - Protection of animal species and vegetation; - A zoological garden; - Stopping the motorized vechiles’ access; - Picnic areas; - Clearer maps of the area; |

1. Stakeholder group profile – biking users

| **Stakeholder group name:** | ***Cycling users*** |
| --- | --- |
| **Predominant age class (with %):** | |  | | What is the main purpose of your visit to the Făget Forest? Multiple answers are possible – in this case please rank them in order 1-5 – 1 being the least important purpose and 5 the most important purpose. Cycling | | | | | Total | | --- | --- | --- | --- | --- | --- | --- | --- | | **1** | **2** | **3** | **4** | **5** | | **Age** | **18-30** | 3 | 3 | 2 | 1 | 6 (15.5%) | 15 | | **30-45** | 10 | 6 | 9 | 18 | 25 (64%) | 68 | | **45-60** | 4 | 3 | 1 | 4 | 6 (15.5%) | 18 | | **Above 60** | 0 | 0 | 0 | 0 | 2 (5%) | 2 | | **Total** | | 17 | 12 | 12 | 23 | 39 (100%) | 103 | |
| **Predominant education status (with %):** | |  | | 3) What is the main purpose of your visit to the Făget Forest? Multiple answers are possible – in this case please rank them in order 1-5 – 1 being the least important purpose and 5 the most important purpose. Cycling | | | | | Total | | --- | --- | --- | --- | --- | --- | --- | --- | | **1** | **2** | **3** | **4** | **5** | | Formal level of education | Elementary School | 1 | 0 | 0 | 0 | 1 (3%) | 2 | | High School | 1 | 1 | 0 | 0 | 4 (10%) | 6 | | College, University | 4 | 6 | 7 | 7 | 19 (49%) | 43 | | Master | 8 | 5 | 5 | 14 | 15 (38%) | 47 | | Doctorate | 3 | 0 | 0 | 2 | 0 | 5 | | Total | | 17 | 12 | 25 | 23 | 39 (100%) | 103 | |
| **Predominant working status (with %):** | |  | | What is the main purpose of your visit to the Făget Forest? Multiple answers are possible – in this case please rank them in order 1-5 – 1 being the least important purpose and 5 the most important purpose. Cycling | | | | | Total | | --- | --- | --- | --- | --- | --- | --- | --- | | **1** | **2** | **3** | **4** | **5** | | Employment status | Employed | 12 | 8 | 8 | 18 | 26 (65%) | 71 | | Employed, Self employe | 1 | 0 | 1 | 0 | 0 | 2 | | Self employed | 3 | 2 | 1 | 4 | 10 (25%) | 20 | | Pupil/student | 1 | 1 | 1 | 0 | 1 (2.5%) | 4 | | Unemployed | 0 | 1 | 0 | 0 | 1 (2.5%) | 1 | | Event organizer | 0 | 0 | 0 | 0 | 1 (2.5%) | 1 | | Retired | 0 | 0 | 0 | 0 | 1 (2.5%) | 1 | | Free lancer | 0 | 0 | 1 | 0 | 0 | 1 | | Registered sole trader | 0 | 0 | 0 | 1 | 0 | 1 | | Total | | 17 | 12 | 12 | 23 | 39 (100%) | 103 | |
| **Average distance from the focus area (with %):** | |  | | What is the main purpose of your visit to the Făget Forest? Multiple answers are possible – in this case please rank them in order 1-5 – 1 being the least important purpose and 5 the most important purpose. Cycling | | | | | Toal | | --- | --- | --- | --- | --- | --- | --- | --- | | **1** | **2** | **3** | **4** | **5** | | Location of the residence | Near vicinity of the Făget Forest (up to 1 km away) | 3 | 1 | 0 | 2 | 5 (13%) | 11 | | Vicinity of the Făget Forest (up to 3 km away) | 6 | 6 | 5 | 6 | 13 (33%) | 36 | | The City of Cluj-Napoca (up to 3 km away from focus area) | 7 | 3 | 7 | 13 | 18 46%) | 48 | | Outside the City of Cluj-Napoca | 1 | 2 | 0 | 2 | 3 (8%) | 8 | | Total | | 17 | 12 | 12 | 31 | 39 (100%) | 103 | |
| **How often do they on average visit the focus area (with %):** | |  | | What is the main purpose of your visit to the Făget Forest? Multiple answers are possible – in this case please rank them in order 1-5 – 1 being the least important purpose and 5 the most important purpose. Cycling | | | | | Total | | --- | --- | --- | --- | --- | --- | --- | --- | | **1** | **2** | **3** | **4** | **5** | | How often do you visit the Făget Forest? | Daily | 1 | 1 | 0 | 1 | 4 (10%) | 7 | | Once per week | 3 | 2 | 1 | 7 | 9 (23%) | 22 | | Several times per week | 4 | 3 | 6 | 6 | 12 (31%) | 31 | | Once a month | 1 | 0 | 1 | 3 | 4 (10%) | 14 | | Several times per month | 1 | 0 | 1 | 3 | 4 (10%) | 9 | | Several times per year | 4 | 4 | 1 | 3 | 4 (10%) | 16 | | Once a week, several times per week | 1 | 0 | 0 | 0 | 2 (6%) | 3 | | Once a month, several times per month | 0 | 0 | 0 | 1 | 0 | 1 | | Total | | 17 | 12 | 12 | 23 | 39 (100%) | 103 | |
| **Predominant type of access to the focus area (with %):** | |  | | What is the main purpose of your visit to the Făget Forest? Multiple answers are possible – in this case please rank them in order 1-5 – 1 being the least important purpose and 5 the most important purpose. Cycling | | | | | Total | | --- | --- | --- | --- | --- | --- | --- | --- | | **1** | **2** | **3** | **4** | **5** | | How do you usually access Făget Forest? | On foot | 6 | 3 | 1 | 3 | 4 (10%) | 17 | | On foot, by bicycle | 1 | 0 | 0 | 0 | 3 (8%) | 4 | | On foot, by bicycle, by car | 0 | 1 | 2 | 3 | 5 (13%) | 11 | | On foot, by car | 0 | 0 | 2 | 1 | 0 | 3 | | By bicycle | 0 | 0 | 0 | 1 | 8 (20%) | 9 | | By bicycle, by public transport | 0 | 0 | 0 | 0 | 1 (3%) | 1 | | By bicycle, by public transport, by car | 0 | 0 | 0 | 1 | 2 (5%) | 3 | | By bicycle, by car | 0 | 0 | 3 | 3 | 6 (15%) | 12 | | By public transport | 2 | 1 | 1 | 1 | 0 | 5 | | By car | 8 | 7 | 3 | 10 | 10 (26%) | 38 | | Total | | 17 | 12 | 12 | 23 | 39 (100%) | 103 | |
| **How much time do they on average spend on the focus area (with %):** | |  | | What is the main purpose of your visit to the Făget Forest? Multiple answers are possible – in this case please rank them in order 1-5 – 1 being the least important purpose and 5 the most important purpose. Cycling | | | | | Total | | --- | --- | --- | --- | --- | --- | --- | --- | | **1** | **2** | **3** | **4** | **5** | | How much time do you on average spend on Făget Forest per visit? | 1-2 h | 10 | 7 | 6 | 11 | 17 (44%) | 51 | | 2-5 h | 6 | 4 | 5 | 11 | 16 (41%) | 42 | | More than 5 h | 1 | 0 | 1 | 0 | 2 (5%) | 4 | | Up to 1 h | 0 | 0 | 0 | 0 | 1 (2.5%) | 1 | | Up-to 1h, 1-2 h, 2-5 h | 0 | 0 | 0 | 0 | 1 (2.5%) | 1 | | 1-2 h, 2-5 h | 0 | 1 | 0 | 1 | 2 (5%) | 4 | | Total | | 17 | 12 | 12 | 23 | 39 (100%) | 103 | |
| **Do they know what type of protection/adapted management regime is present on the focus area (with %)?** | |  | | What is the main purpose of your visit to the Făget Forest? Multiple answers are possible – in this case please rank them in order 1-5 – 1 being the least important purpose and 5 the most important purpose. Cycling | | | | | Total | | --- | --- | --- | --- | --- | --- | --- | --- | | **1** | **2** | **3** | **4** | **5** | | Do you think that the area of Făget Forest is partially or fully protected as | Area of high natural value | 1 | 2 | 1 | 3 | 6 (16%) | 13 | | Area of high natural value and ”Natura 2000” area | 0 | 0 | 1 | 3 | 1 (3%) | 5 | | Area of high natural value, ”Natura 2000” area, Forest with special purpose, Cultural heritage area and Protected area | 0 | 0 | 0 | 1 | 0 | 1 | | Area of high natural value, ”Natura 2000” area and Cultural heritage area | 0 | 0 | 1 | 0 | 0 | 1 | | Area of high natural value, ”Natura 2000” area and Protected area | 0 | 1 | 0 | 1 | 0 | 2 | | Area of high natural value and Forest with special purpose | 0 | 1 | 0 | 0 | 0 | 1 | | Area of high natural value and Protected area | 1 | 0 | 0 | 0 | 0 | 1 | | Area of high natural value; No, it is not protected | 0 | 0 | 1 | 0 | 0 | 1 | | ”Natura 2000” area | 9 | 6 | 2 | 10 | 19 (51%) | 46 | | ”Natura 2000” area and Protected area | 0 | 0 | 1 | 0 | 0 | 1 | | ”Natura 2000” area, Cultural heritage area  and Protected area | 0 | 0 | 0 | 0 | 1 (3%) | 1 | | ”Natura 2000” area and Forest with special purpose | 0 | 0 | 0 | 1 | 0 | 1 | | ”Natura 2000” area and No, it is not protected | 1 | 0 | 1 | 0 | 1 (3%) | 3 | | Protected area | 0 | 1 | 0 | 0 | 1 (3%) | 2 | | Cultural heritage area | 1 | 0 | 0 | 0 | 0 | 1 | | Forest with special purpose | 0 | 0 | 1 | 0 | 0 | 1 | | No, it is not protected | 4 | 0 | 2 | 4 | 8 (21%) | 18 | | Total | | 17 | 12 | 12 | 23 | 39 (100%) | 103 | |
| **List of key expressed problems/challenges:** | The cycling users consider that the further activities should be forbidden in the Făget Forest:   - The access of the motorized vehicles and motorized sports; - Throwing waste; - Lighting fire in the forest, or her vicinity; - Forest exploitation/ deforestation and illegal cuttings; - Grills organized in non-allowed areas; - The loud music/ parties; - Access to vehicles and machinery and housing construction; - Those who drive on driveway with high speed and who seem to be at rallies; - Hunting - danger of extinction of wild animals and danger to people in the forest; |
| **List of key expressed suggestions for improvement:** | The cycling users consider that the further activities should be developed in the Făget Forest:   - Thematic routes for children; - Arrangement of wooden constructions (cottages, benches and tables, stairs, bridges, animal figurines and not only) on thematic paths of 1-2 hours, which children could "explore" (for 4-10 years old); - Creating an alternative descent route on 2 of the narrower parts of the off-road route for beginners to Micesti Houses and to Turzii/ Tureni Gorge; - Promoting public transport to access the area; - Marking the circuit trails and create online maps along with gps tracks; - Promoting different types of sports (running, hiking, cycling etc.); - Organising trips for children with the group from the schools in Cluj-Napoca; - Adventure park; - Dedicated and maintained Bike Park ( see Austria's Obertraun model <http://www.mtb-grandprix.at/en>). Both the ground and the location are favorable (the Observatory area); - Possibilities for active rest; - Creating parking lots, garbage cans, treadmills, lighting paths like in a park; - Building sidewalks so you can walk and don’t have to go by car; - Hiking signs towards marked trails; - Organizing certain days, with themes; - Walking with family/ dogs; - Greening activities; - Education for nature; - Well marked and maintained MTT trails, MOTO (Enduro) trails< - Grilling and camping areas; - Prohibition of constructions in the immediate vicinity of the forest; - Monitoring, informing people what is allowed and not, responding to the complaints of the people; - A parking place with the possibility to buy different foods; - Sport and tourism orientation; - Running tracks; - Panels with area description; - Deer feeding areas, birds, etc.; - Educating the young, through respect and care for nature, learning about plants and animals, cleaning sessions, etc.; - Recreation, but closer to the city, like Unirea; - Applying sanctions when necessary; - Stoping the cutting the forest; - Popularization of the persons agressing the nature; |

1. Stakeholder group profile – hiking users

| **Stakeholder group name:** | ***Users spending time with their family*** |
| --- | --- |
| **Predominant age class (with %):** | |  | | What is the main purpose of your visit to the Făget Forest? Multiple answers are possible – in this case please rank them in order 1-5 – 1 being the least important purpose and 5 the most important purpose. Spending time with family | | | | | Total | | --- | --- | --- | --- | --- | --- | --- | --- | | **1** | **2** | **3** | **4** | **5** | | **Age** | **18-30** | 2 | 3 | 4 |  | 2 (5%) | 13 | | **30-45** | 7 | 8 | 19 | 14 | 33 (75%) | 81 | | **45-60** | 2 | 0 | 5 | 6 | 9 (25%) | 22 | | **Above 60** | 0 | 0 | 0 | 1 | 0 | 1 | | **Total** | | 11 | 11 | 28 | 23 | 44 (100%) | 117 | |
| **Predominant education status (with %):** | |  | | 3) What is the main purpose of your visit to the Făget Forest? Multiple answers are possible – in this case please rank them in order 1-5 – 1 being the least important purpose and 5 the most important purpose. Spending time with family | | | | | Total | | --- | --- | --- | --- | --- | --- | --- | --- | | **1** | **2** | **3** | **4** | **5** | | Formal level of education | Elementary School | 1 | 0 | 0 | 0 | 1 (2%) | 2 | | High School | 1 | 2 | 2 | 0 | 1 (2%) | 6 | | College, University | 5 | 5 | 10 | 7 | 18 (41%) | 45 | | Master | 4 | 4 | 15 | 11 | 20 (46%) | 54 | | Doctorate | 0 | 0 | 1 | 5 | 4 (9%) | 10 | | Total | | 11 | 11 | 28 | 23 | 44 | 69 | |
| **Predominant working status (with %):** | |  | | | | | | | | | | --- | --- | --- | --- | --- | --- | --- | --- | --- | |  | | | | | | | | | |  | | What is the main purpose of your visit to the Făget Forest? Multiple answers are possible – in this case please rank them in order 1-5 – 1 being the least important urpose and 5 the most important purpose. Spending time with family | | | | | Total | | **1** | **2** | **3** | **4** | **5** | | Employment status | Employed | 9 | 9 | 20 | 20 | 27 (62%) | 84 | | Employed, Self employed | 0 | 0 | 1 | 0 | 3 (7%) | 4 | | Self employed | 1 | 1 | 4 | 3 | 11 (25%) | 20 | | Pupil/student | 1 | 1 | 1 | 0 | 0 | 3 | | Unemployed | 0 | 0 | 0 | 0 | 1 (2%) | 1 | | Event organizer | 0 | 0 | 0 | 0 | 1 (2%) | 1 | | Free lancer | 0 | 0 | 1 | 0 | 0 | 1 | | Registered sole trader | 1 | 0 | 1 | 0 | 1 (2%) | 2 | | Total | | 11 | 11 | 28 | 23 | 44 | 117 | |
| **Average distance from the focus area (with %):** | |  | | What is the main purpose of your visit to the Făget Forest? Multiple answers are possible – in this case please rank them in order 1-5 – 1 being the least important purpose and 5 the most important purpose. Spending time with family | | | | | Total | | --- | --- | --- | --- | --- | --- | --- | --- | | **1** | **2** | **3** | **4** | **5** | | Location of the residence | Near vicinity of the Făget Forest (up to 1 km away) | 1 | 1 | 3 | 2 | 6 (14%) | 13 | | Vicinity of the Făget Forest (up to 3 km away) | 4 | 2 | 11 | 7 | 16 (36%) | 40 | | The City of Cluj-Napoca (up to 3 km away from focus area) | 6 | 6 | 13 | 11 | 18 (41%) | 54 | | Outside the City of Cluj-Napoca | 0 | 2 | 1 | 3 | 4 (9%) | 10 | | Total | | 11 | 11 | 28 | 23 | 44 (100%) | 117 | |
| **How often do they on average visit the focus area (with %):** | |  | | What is the main purpose of your visit to the Făget Forest? Multiple answers are possible – in this case please rank them in order 1-5 – 1 being the least important purpose and 5 the most important purpose. Spending time with family | | | | | Total | | --- | --- | --- | --- | --- | --- | --- | --- | | **1** | **2** | **3** | **4** | **5** | | How often do you visit the Făget Forest? | Daily | 0 | 0 | 2 | 1 | 5 (11%) | 8 | | Once per week | 3 | 2 | 7 | 5 | 9 (21%) | 26 | | Several times per week | 4 | 0 | 7 | 5 | 15(34%) | 31 | | Once a month | 2 | 5 | 4 | 2 | 5 (11%) | 18 | | Several times per month | 1 | 1 | 1 | 4 | 4 (9%) | 11 | | Several times per year | 1 | 3 | 7 | 2 | (14%) | 19 | | Once a week, several times per week | 0 | 0 | 0 | 3 | 0 | 3 | | Several times per month, several times per year | 0 | 0 | 0 | 1 | 0 | 1 | | Total | | 11 | 11 | 28 | 23 | 44 (100%) | 117 | |
| **Predominant type of access to the focus area (with %):** | |  | | What is the main purpose of your visit to the Făget Forest? Multiple answers are possible – in this case please rank them in order 1-5 – 1 being the least important purpose and 5 the most important purpose. Spending time with family | | | | | Total | | --- | --- | --- | --- | --- | --- | --- | --- | | **1** | **2** | **3** | **4** | **5** | | How do you usually access Făget Forest? | On foot | 3 | 2 | 5 | 5 | 9 (20%) | 24 | | On foot, by bicycle | 1 | 0 | 1 | 0 | 1 (2%) | 3 | | On foot, by bicycle, by car | 0 | 1 | 2 | 2 | 5 (11%) | 10 | | On foot, by car | 0 | 0 | 1 | 1 | 3 (7%) | 5 | | On foot, by public transport | 0 | 0 | 1 | 0 | 0 | 1 | | On foot, by public transport, by car | 0 | 0 | 0 | 0 | 1 (2%) | 1 | | By bicycle | 0 | 2 | 2 | 1 | 3 (7%) | 8 | | By bicycle, by public transport | 0 | 1 | 0 | 0 | 0 | 1 | | By bicycle, by public transport, by car | 0 | 0 | 1 | 0 | 2 (5%) | 3 | | By bicycle, by car | 3 | 2 | 3 | 1 | 2 (5%) | 11 | | By public transport | 0 | 0 | 1 | 1 | 2 (5%) | 4 | | By car | 4 | 3 | 11 | 12 | 16 (36%) | 46 | | Total | | 11 | 11 | 28 | 23 | 44 (100%) | 117 | |
| **How much time do they on average spend on the focus area (with %):** | |  | | What is the main purpose of your visit to the Făget Forest? Multiple answers are possible – in this case please rank them in order 1-5 – 1 being the least important purpose and 5 the most important purpose. Spending time with family | | | | | Total | | --- | --- | --- | --- | --- | --- | --- | --- | | **1** | **2** | **3** | **4** | **5** | | How much time do you on average spend on Făget Forest per visit? | 1-2 h | 3 | 6 | 17 | 10 | 11 (25%) | 47 | | 2-5 h | 7 | 4 | 11 | 10 | 26 (59%) | 58 | | More than 5 h | 0 | 1 | 0 | 1 | 3 (7%) | 5 | | Up to 1 h | 0 | 0 | 0 | 0 | 1 (2%) | 1 | | Up-to 1h, 1-2 h, 2-5 h | 0 | 0 | 0 | 0 | 1 (2%) | 1 | | 1-2 h, 2-5 h | 1 | 0 | 0 | 2 | 2 (5%) | 5 | | Total | | 11 | 11 | 28 | 23 | 44 (100%) | 117 | |
| **Do they know what type of protection/adapted management regime is present on the focus area (with %)?** | |  | | What is the main purpose of your visit to the Făget Forest? Multiple answers are possible – in this case please rank them in order 1-5 – 1 being the least important purpose and 5 the most important purpose. Spending time with family | | | | | Total | | --- | --- | --- | --- | --- | --- | --- | --- | | **1** | **2** | **3** | **4** | **5** | | Do you think that the area of Făget Forest is partially or fully protected as | Area of high naural value | 0 | 1 | 7 | 1 | 3 (7%) | 12 | | Area of high natural value and ”Natura 2000” area | 0 | 0 | 0 | 1 | 4 (9%) | 5 | | Area of high natural value, ”Natura 2000” area, Forest with special purpose, Cultural heritage area and Protected area | 0 | 0 | 0 | 0 | 1 (2%) | 1 | | Area of high natural value, ”Natura 2000” area and Cultural heritage area | 1 | 0 | 0 | 0 | 0 | 1 | | Area of high natural value, ”Natura 2000” area and Protected area | 0 | 0 | 0 | 0 | 1 (2%) | 1 | | Area of high natural value, ”Natura 2000” area, Cultural heritage area, Forest with special purpose | 0 | 0 | 0 | 0 | 2 (5%) | 2 | | Area of high natural value and Forest with special purpose | 0 | 0 | 1 | 0 | 0 | 1 | | Area of high natural value and Protected area | 0 | 0 | 1 | 1 | 0 | 2 | | Area of high natural value; No, it is not protected | 0 | 0 | 0 | 0 | 1 (2%) | 1 | | ”Natura 2000” area | 9 | 6 | 10 | 13 | 18 (41%) | 56 | | ”Natura 2000” area and Protected area | 0 | 0 | 0 | 0 | 1 (2%) | 1 | | ”Natura 2000” area, Cultural heritage area  and Protected area | 0 | 0 | 0 | 0 | 1 (2%) | 1 | | ”Natura 2000” area and Forest with special purpose | 0 | 0 | 1 | 0 | 2 (5%) | 3 | | ”Natura 2000” area and No, it is not protected | 0 | 1 | 1 | 1 | 0 | 3 | | Protected area | 0 | 0 | 0 | 0 | 1 (2%) | 1 | | Cultural heritage area | 0 | 0 | 0 | 1 | 0 | 1 | | Forest with special purpose | 0 | 1 | 2 | 1 | 1 (2%) | 5 | | No, it is not protected | 1 | 2 | 5 | 4 | 8 (18%) | 20 | | Total | | 11 | 11 | 28 | 23 | 44 (100%) | 117 | |
| **List of key expressed problems/challenges:** | The users spending time with their family consider that the further activities should be forbidden in the Făget Forest:   - Motorized sports and vehicles; - Forest exploitations; - The open fire and grills in the forest; - Housing construction; - Dumping the garbage; - Loud music; - Smoking; - Sheep grazing; - Any pollution-producing activities; - Walking dogs without a leash; |
| **List of key expressed suggestions for improvement:** | The users spending time with their family consider that the further activities should be developed in the Făget Forest:   - Greening activities; - Do not interfere because it means destroying it and it also means chasing away the animals and birds; - Running, hiking, cycling and sports competitions involving these activities; - Excursions for school children; - Maintenance of the running and cycling paths; - Remarking the cycling paths; - Preserving, protecting the trails and markings; - Installation of trash cans; - Educational activities- education for nature (protection, awareness of importance for forest-ecosystems, protection of protected species); - Photo safaris; - Patrols of local police / gendarmerie to prevent 4x4 access, waste abandonment, illegal cuts; - Volunteering activities; - Integration of Făget trails into national and international long-distance trails; - Sled track; - Combating illegal tree cuts; - Exits in group for the awareness of the importance of such a surface for the beings who live in it and for the people / the city; - Prohibition of constructions in the immediate vicinity of the forest; - Activities to increase understanding of the area; - Protection of animal species and vegetation; - Sports orientation; - Points for fauna observation; - Zoo garden; - Recreation; - Banning the motorized sports; - Sled with horses in winter; - MTB; - Playgrounds for children; - Picnic areas, clearer maps of the area. |

1. Stakeholder group profile – educational activities

| **Stakeholder group name:** | ***Users involved in educational activities*** |
| --- | --- |
| **Predominant age class (with %):** | |  | | What is the main purpose of your visit to the Făget Forest? Multiple answers are possible – in this case please rank them in order 1-5 – 1 being the least important purpose and 5 the most important purpose. Educational activities | | | | | Total | | --- | --- | --- | --- | --- | --- | --- | --- | | **1** | **2** | **3** | **4** | **5** | | **Age** | **18-30** | 4 | 1 | 3 | 2 | 1 (5%) | 11 | | **30-45** | 16 | 6 | 9 | 13 | 14(74%) | 58 | | **45-60** | 1 | 0 | 4 | 4 | 3 (16%) | 12 | | **Above 60** | 0 | 0 | 0 | 0 | 1 (5%) | 1 | | **Total** | | 21 | 7 | 16 | 19 | 19 (100%) | 82 | |
| **Predominant education status (with %):** | |  | | 3) What is the main purpose of your visit to the Făget Forest? Multiple answers are possible – in this case please rank them in order 1-5 – 1 being the least important purpose and 5 the most important purpos. Educational activities | | | | | Total | | --- | --- | --- | --- | --- | --- | --- | --- | | **1** | **2** | **3** | **4** | **5** | | Fomal level of education | Elementary School | 0 | 0 | 1 | 0 | 0 | 1 | | High School | 3 | 0 | 1 | 1 | 1 (5%) | 6 | | College, University | 13 | 2 | 6 | 4 | 10 (53%) | 35 | | Master | 5 | 4 | 7 | 12 | 8 (42%) | 36 | | Doctorate | 0 | 1 | 2 | 1 | 0 | 4 | | Total | | 21 | 7 | 16 | 19 | 19 (100%) | 82 | |
| **Predominant working status (with %):** | |  | | What is the main purpose of your visit to the Făget Forest? Multiple answers are possible – in this case please rank the in order 1-5 – 1 being the least important purpose and 5 the most important purpose. Educational activities | | | | | Total | | | --- | --- | --- | --- | --- | --- | --- | --- | --- | | **1** | **2** | **3** | **4** | **5** | | Employment status | Employed | 16 | 6 | 11 | 15 | 13 (69%) | 61 | | | Employed, Self employed | 0 | 1 | 0 | 0 | 0 | 1 | | | Self employed | 4 | 0 | 2 | 3 | 4 (21%) | 13 | | | Pupil/student | 0 | 0 | 3 | 0 | 0 | 3 | | | Unemployed | 0 | 0 | 0 | 0 | 1 (5%) | 1 | | | Free lancer | 1 | 0 | 0 | 0 | 0 | 1 | | | Registered sole trader | 0 | 0 | 1 | 0 | 1 (5%) | 2 | | | Total | | 21 | 7 | 16 | 19 | 19 (100%) | 82 | | |  |  |  |  |  | |  | |  | |  | |
| **Average distance from the focus area (with %):** | |  | | What is the main purpose of your visit to the Făget Forest? Multiple answers are possible – in this case please rank them in order 1-5 – 1 being the least important purpose and 5 the most important purpose. Educational activities | | | | | Total | | --- | --- | --- | --- | --- | --- | --- | --- | | **1** | **2** | **3** | **4** | **5** | | Location of the residence | Near vicinity of the Făget Forest (up to 1 km away) | 3 | 1 | 2 | 3 | 2 (11%) | 11 | | Vicinity of the Făget Forest (up to 3 km away) | 5 | 2 | 4 | 5 | 9 (47%) | 25 | | The City of Cluj-Napoca (up to 3 km away from focus area) | 12 | 3 | 9 | 9 | 7 (27%) | 40 | | Outside the City of Cluj-Napoca | 1 | 1 | 1 | 2 | 1 (5%) | 6 | | Total | | 21 | 7 | 16 | 19 | 19 (10%) | 82 | |
| **How often do they on average visit the focus area (with %):** | |  | | What is the main purpose of your visit to the Făget Forest? Multiple answers are possible – in this case please rank them in order 1-5 – 1 being the least important purpose and 5 the most important purpose. Educational activities | | | | | Total | | --- | --- | --- | --- | --- | --- | --- | --- | | **1** | **2** | **3** | **4** | **5** | | How often do you visit the Făget Forest? | Daily | 1 | 1 | 0 | 2 | 3 (16%) | 7 | | Once per week | 5 | 1 | 3 | 4 | 3 (16%) | 16 | | Several times per wek | 6 | 1 | 2 | 3 | 7 (37%) | 19 | | Once a month | 2 | 1 | 3 | 5 | 3 (16%) | 14 | | Several times per month | 1 | 1 | 2 | 0 | 1 (5%) | 5 | | Several times per year | 5 | 1 | 5 | 5 | 2 (10%) | 18 | | Once a week, several times per week | 1 | 0 | 1 | 0 | 0 | 2 | | Several times per month, several times per year | 0 | 1 | 0 | 0 | 0 | 1 | | Total | | 21 | 7 | 16 | 19 | 19 (100%) | 82 | |
| **Predominant type of access to the focus area (with %):** | |  | | What is the main purpose of your visit to the Făget Forest? Multiple answers are possible – in this case please rank them in order 1-5 – 1 being the least important purpose and 5 the most important purpose. Educational activities | | | | | Total | | --- | --- | --- | --- | --- | --- | --- | --- | | **1** | **2** | **3** | **4** | **5** | | How do you usually access Făget Forest? | On foot | 3 | 3 | 5 | 3 | 6 (32%) | 20 | | n foot, by bicycle | 1 | 0 | 0 | 0 | 0 | 1 | | On foot, by bicycle, by car | 1 | 0 | 1 | 2 | 2 (10.5%) | 6 | | On foot, by car | 1 | 0 | 0 | 2 | 0 | 3 | | On foot, by public transport | 0 | 0 | 0 | 1 | 0 | 1 | | On foot, by public transport, by car | 0 | 0 | 0 | 0 | 1 (5%) | 1 | | By bicycle | 3 | 0 | 1 | 1 | 1 (5%) | 6 | | By bicycle, by public transport | 1 | 0 | 0 | 0 | 0 | 1 | | By bicycle, by public transport, by car | 0 | 1 | 0 | 0 | 0 | 1 | | By bicycle, by car | 3 | 0 | 0 | 2 | 2 (10.5%) | 7 | | By public transport | 0 | 0 | 0 | 3 | 1 (5%) | 4 | | By car | 8 | 3 | 9 | 5 | 6 (32%) | 31 | | Total | |  | 21 | 7 | 16 | 19 (100%) | 19 | |
| **How much time do they on average spend on the focus area (with %):** | |  | | What is the main purpose of your visit to the Făget Forest? Multiple answers are possible – in this case please rank them in order 1-5 – 1 being the least important purpose and 5 the most important purpose. Educational activities | | | | | Total | | --- | --- | --- | --- | --- | --- | --- | --- | | **1** | **2** | **3** | **4** | **5** | | How much time do you on average spend on Făget Forest per visit? | 1-2 h | 9 | 3 | 9 | 9 | 6 (32%) | 36 | | 2-5 h | 10 | 3 | 6 | 9 | 7 (37%) | 35 | | More than 5 h | 0 | 0 | 1 | 1 | 4 (21%) | 6 | | Up-to 1h, 1-2 h, 2-5 h | 0 | 0 | 0 | 0 | 1 (5%) | 1 | | 1-2 h, 2-5 h | 2 | 1 | 0 | 0 | 1 (5%) | 4 | | Total | | 21 | 7 | 16 | 19 | 19 (100%) | 82 | |
| **Do they know what type of protection/adapted management regime is present on the focus area (with %)?** | |  | | What is the main purpose of your visit to the Făget Forest? Multiple answers are possible – in this case please rank them in order 1-5 – 1 being the least important purpose and 5 the most important purpose. Educational activities | | | | | Total | | --- | --- | --- | --- | --- | --- | --- | --- | | **1** | **2** | **3** | **4** | **5** | | Do you think that the area of Făget Forest is partially or fully protected as | Areaof high natural value | 1 | 1 | 0 | 4 | 3 (15%) | 9 | | Area of high natural value and ”Natura 2000” area | 0 | 0 | 0 | 1 | 1 (5%) | 2 | | Area of high natural value, ”Natura 2000” area, Forest with special purpose, Cultural heritage area and Protected area | 0 | 0 | 0 | 1 | 0 | 1 | | Area of high natural value, ”Natura 2000” area and Cultural heritage area | 0 | 0 | 0 | 0 | 1 (5%) | 1 | | Area of high natural value, ”Natura 2000” area and Protected area | 0 | 0 | 0 | 0 | 1 (5%) | 1 | | Area of high natural value, ”Natura 2000” area, Cultural heritage area, Forest with special purpose | 0 | 0 | 0 | 0 | 1 (5%) | 1 | | Area of high natural value and Forest with special purpose | 0 | 0 | 1 | 0 | 0 | 1 | | Area of high natural value and Protected area | 0 | 0 | 1 | 0 | 0 | 1 | | Area of high natural value; No, it is not protected | 0 | 0 | 1 | 0 | 0 | 1 | | ”Natura 2000” area | 14 | 3 | 9 | 8 | 8 (45%) | 42 | | ”Natura 2000” area, Cultural heritage area  and Protected area | 0 | 0 | 0 | 1 | 1 (5%) | 2 | | ”Natura 2000” area and Forest with special purpose | 0 | 0 | 0 | 1 | 0 | 1 | | ”Natura 2000” area and No, it is not protected | 1 | 0 | 1 | 0 | 0 | 2 | | Protected area | 0 | 0 | 0 | 0 | 1 (5%) | 1 | | Cultural heritage area | 0 | 0 | 0 | 1 | 0 | 1 | | Forest with special purpose | 2 | 0 | 1 | 1 | 0 | 4 | | No, it is not protected | 3 | 3 | 3 | 2 | 2 (10%) | 13 | | Total | | 21 | 7 | 16 | 19 | 19 (100%) | 82 | |
| **List of key expressed problems/challenges:** | The users involved in educational activities that the further activities should be forbidden in the Făget Forest:   - Motorized sports and vehicles; - The open fire and grills in the forest; - Loud parties and noises; - Forest exploitations; - Housing construction; - Dumping the garbage; - Smoking; - Grazing; - Walking dogs without a leash; - Hunting. |
| **List of key expressed suggestions for improvement:** | The users involved in educational activities consider that the further activities should be developed in the Făget Forest:   - Greening activities; - Do not interfere because it means destroying it and it also means chasing away the animals and birds; - Running, hiking, cycling and sports competitions involving these activities; - Excursions for school children; - Running and hiking trails; - Photo safaris; - Patrols of local police / gendarmerie to prevent 4x4 access, waste abandonment, illegal cuts; - Volunteering activities; - Integration of Făget trails into national and international long-distance trails; - Exits in group for the awareness of the importance of such a surface for the beings who live in it and for the people / the city; - Tourist orientation; - New footpaths with area descriptions; |
